# Supplementary material for: Phosphorus–nitrogen compounds. Part 64. Comparative reactions of spiro and ansa (N/O) cyclotetraphosphazenes with bulky (4-fluorobenzyl) N/N and N/O donor type bidentate reagents: structure, stereogenic properties and cytotoxic activity studies
Source: Royal Society of Chemistry journal article supplement (doi:10.1039/d2nj02280j), 2022-01-01
Supplement: d2nj02280j1.pdf [file d2nj02280j1.pdf]

**Phosphorus-Nitrogen Compounds. Part 64. Comparative Reactions of Spiro and Ansa(N/O) Cyclotetraphosphazenes with Bulky (4-Fluorobenzyl) N/N and N/O Donor Type Bidentate Reagents: Structure, Stereogenic Properties and Cytotoxic activity Studies**

**Gamze Elmas<sup>a</sup>, Arzu Binici<sup>b</sup>, Mehtap Yakut<sup>a</sup>, Aytuğ Okumuş<sup>\*a</sup>, Zeynel Kılıç<sup>\*a</sup>, Bünyemin Çoşut<sup>c</sup>, Tuncer Hökelek<sup>d</sup>, Nebahat Aytuna Çerçi<sup>e</sup>, Leyla Açık<sup>f</sup>**

<sup>a</sup>*Department of Chemistry, Ankara University, 06100 Ankara, Türkiye*

<sup>b</sup>*Republic Health Institution of Türkiye, 06100 Ankara, Türkiye*

<sup>c</sup>*Department of Chemistry, Gebze Technical University, 41400 Gebze-Kocaeli, Türkiye*

<sup>d</sup>*Department of Physics, Hacettepe University, 06800 Ankara, Türkiye*

<sup>e</sup>*Department of Bioengineering, Kırıkkale University, 71450 Yahşihan-Kırıkkale, Türkiye*

<sup>f</sup>*Department of Biology, Gazi University, 06500 Ankara, Türkiye*

**SUPPORTING INFORMATION**

**CONTENTS**

|                                                                                                                                                                                                                                                                                                                                |          |
|--------------------------------------------------------------------------------------------------------------------------------------------------------------------------------------------------------------------------------------------------------------------------------------------------------------------------------|----------|
| <b>Section S1.</b> Determination of the cytotoxic activity with MTT assay.....                                                                                                                                                                                                                                                 | <b>2</b> |
| <b>Scheme S1.</b> The Tentative Reaction Routes of spiro ( <b>2</b> ) and 2- <i>cis</i> -4-ansa ( <b>3</b> ) with the Sodium Salt of <b>L3</b> .....                                                                                                                                                                           | <b>3</b> |
| <b>Fig. S1</b> The conformations of (a) the tetramer rings, (b) the six-membered NO spiro rings with the tetramer rings of <b>trans-2b</b> .....                                                                                                                                                                               | <b>4</b> |
| <b>Fig. S2</b> The conformations of (a) the tetramer rings, (b) the eight -membered NO ansa rings, (c) the six-membered NO spiro-rings,(d) the eight -membered NO ansa-rings with the tetramer rings (e) the six-membered NO spiro-rings with the eight -membered NO ansa-rings with the tetramer rings of <b>cis-3b</b> ..... | <b>7</b> |
| <b>Fig. S3.</b> The shapes of the phosphazene rings in <b>trans-2b</b> and <b>cis-3b</b> with torsion angles (deg) given.....                                                                                                                                                                                                  | <b>7</b> |

### **Section S1. Determination of the cytotoxic activity with MTT assay.**

In this study, the cytotoxicities of the phosphazenes were tested by colorimetric MTT assay<sup>1</sup> against L929 mouse fibroblast, Caco-2 colorectal adenocarcinoma and A549 non-small lung cancer cell lines. Cultures were grown and seeded ( $10^4$  cells per well in the 96-well cell culture plates) in Dulbecco's modified Eagle's medium supplemented with 10% fetal bovine serum (DMEM-10), 1% glutamine, 50 U/mL penicillin and 50  $\mu$ g/mL streptomycin in an atmosphere of 5% CO<sub>2</sub> and 100% humidity in air. Cells were incubated for 24. The compounds to be tested were dissolved in DMSO (10%) and applied on cells in five different concentrations (begins from 1665 $\mu$ M and two fold dilutions). The solvent DMSO (10%), cisplatin for comparison, DMEM medium (blank) were used as controls. After 24 h incubation of seeded cells, 50  $\mu$ L MTT (1mg/mL) solution was added to each well. And later 2 h of incubation at 37 °C, 100  $\mu$ L of isopropanol was added to the wells, and the absorbance values of the 96-well plate were read at 570 nm in a microplate reader to determine cell viability. The cytotoxicity studies were made in triplicate and the data were given as mean  $\pm$  standard deviation (SD).

Based on the control groups, the percent viability was calculated by the following formula:

$$Cell\ Viability\ \% = \frac{Compound\ OD}{Control\ OD} \times 100$$

OD: Optical density

Reference:

[1] A. Okumuş, H. Akbaş, K. Kılıç, L. Y. Koç, L. Açıık, B. Aydın, M. Türk, T. Hökelek and H. Dal, *Res. Chem. Intermed.*, 2016, **42**, 4221-4251.

**Scheme S1.** The Tentative Reaction Routes of spiro (**2**) and 2-*cis*-4-ansa (**3**) with the Sodium Salt of **L3**.

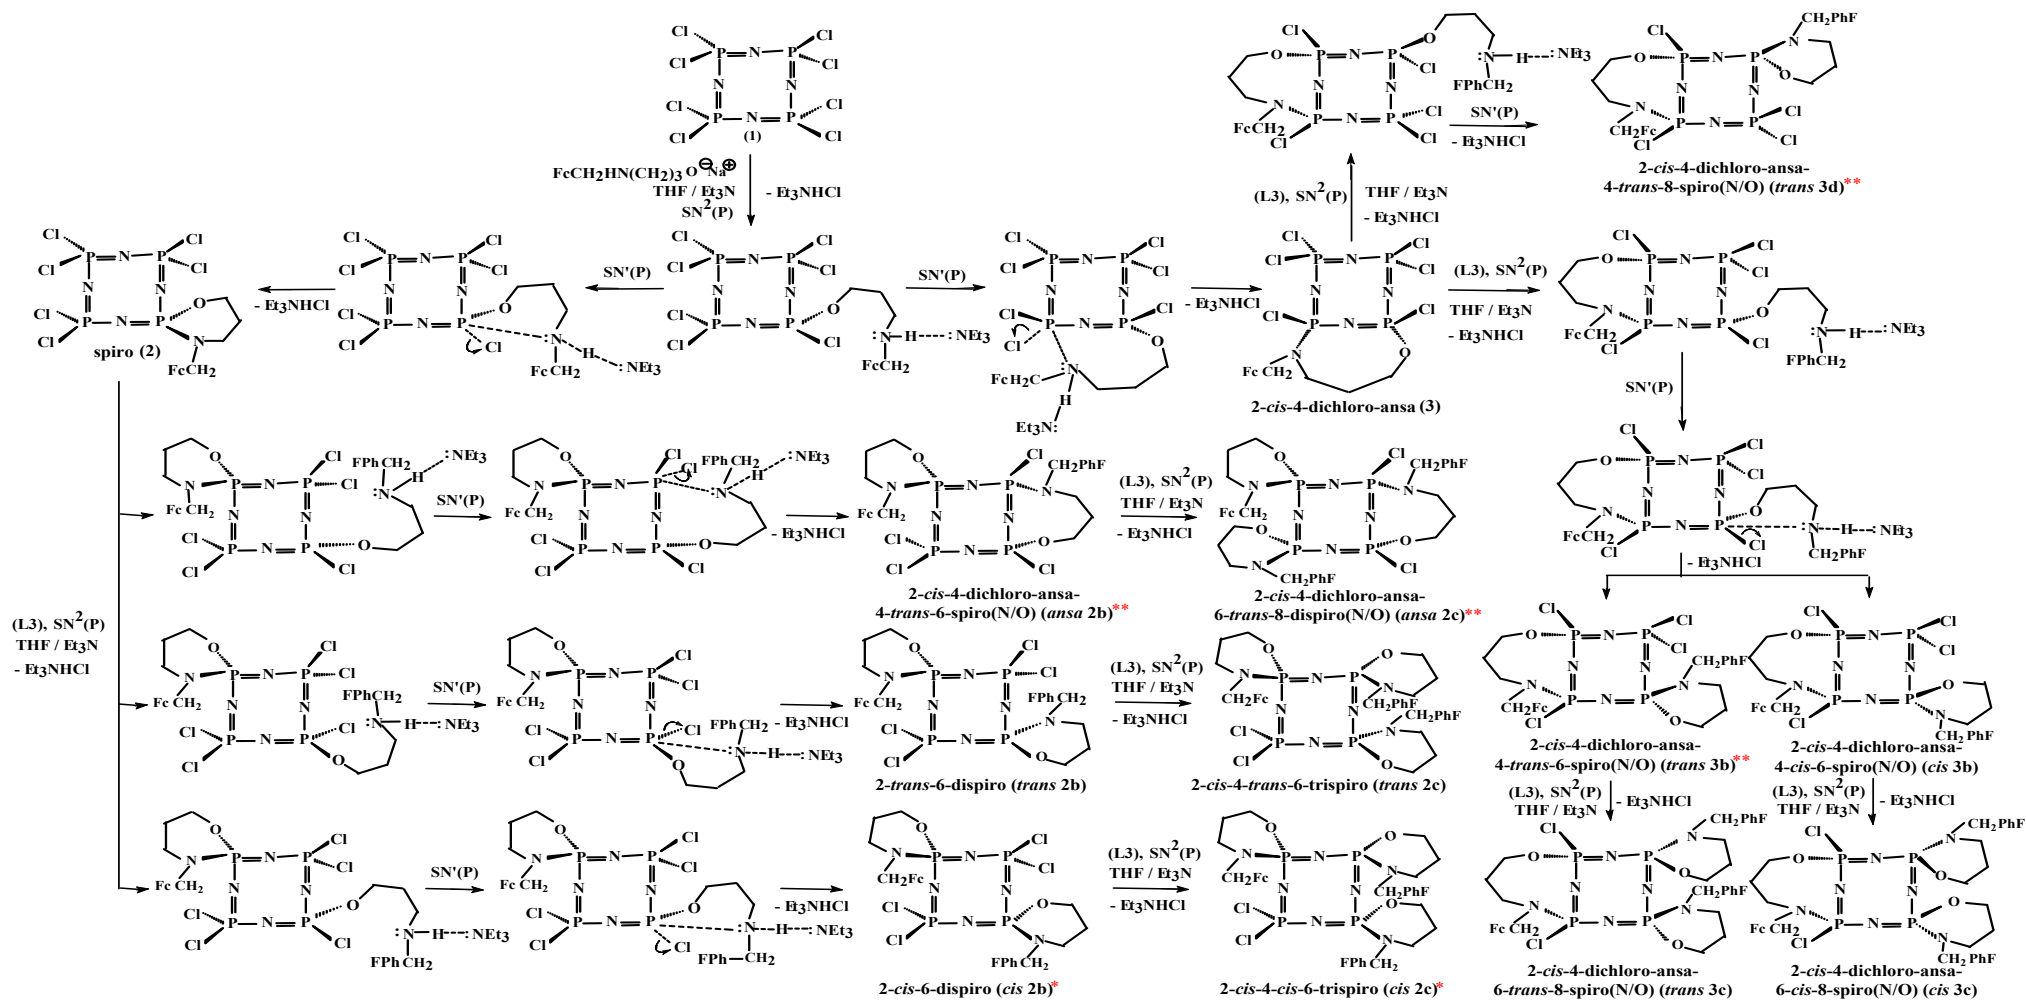

\* Compounds *cis* 2b and *cis* 2c are expected products. But, they are not obtained.

\*\* Compounds *ansa* 2b, *ansa* 2c, *trans* 3b and *trans* 3d are also expected products. But, they are not isolated purely.

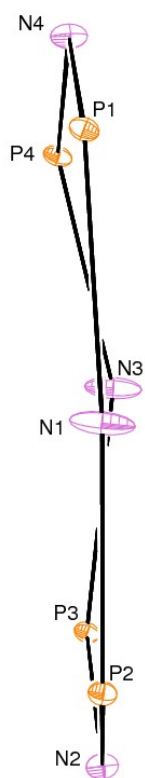

(a)

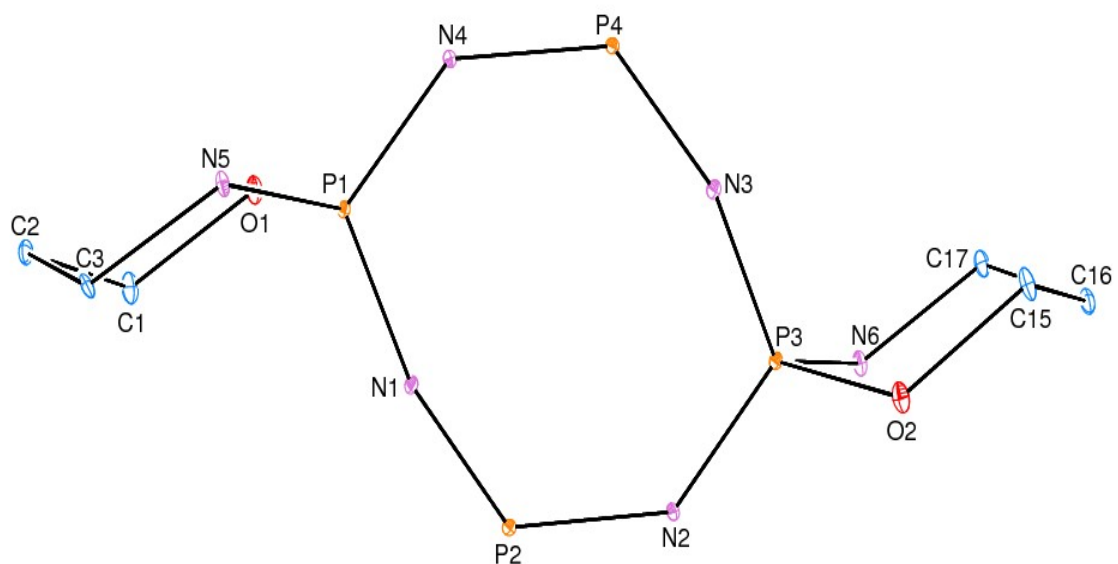

(b)

**Fig. S1** The conformation of (a) the tetramer ring, (b) the six-membered NO spiro rings with the tetramer ring of **trans-2b**.

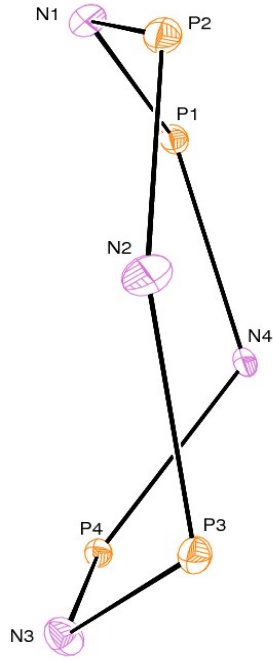

(a)

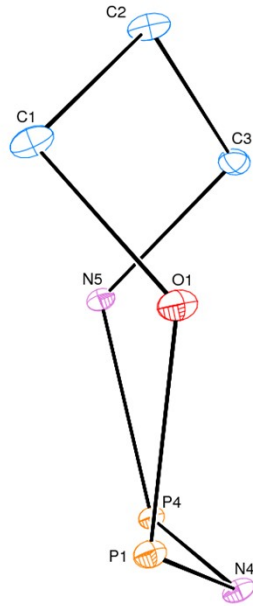

(b)

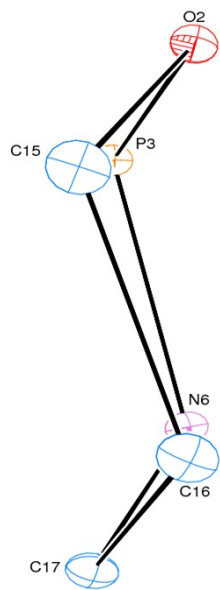

(c)

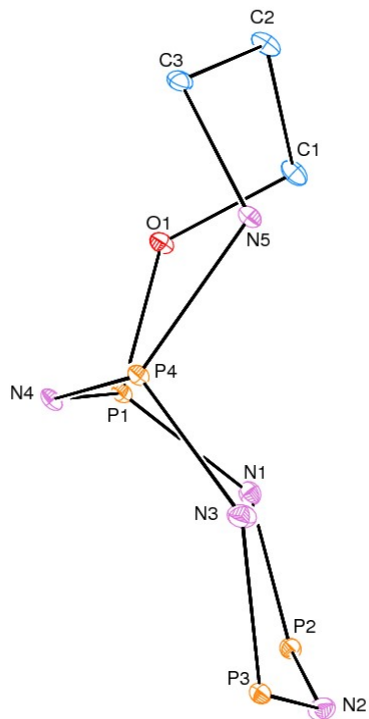

(d)

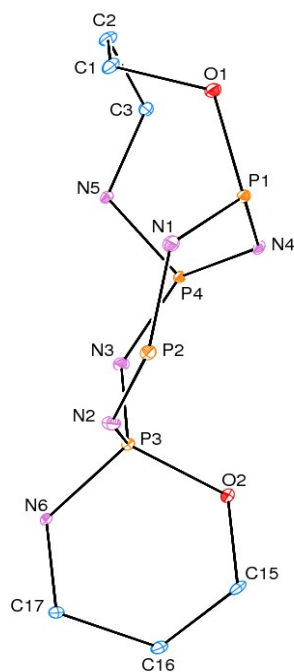

(e)

**Fig. S2** The conformation of (a) the tetramer ring, (b) the eight -membered NO ansa ring, (c) the six-membered NO spiro-ring, (d) the eight -membered NO ansa-ring with the tetramer ring (e) the six-membered NO spiro-ring with the eight -membered NO ansa-ring with the tetramer ring of **cis-3b**.

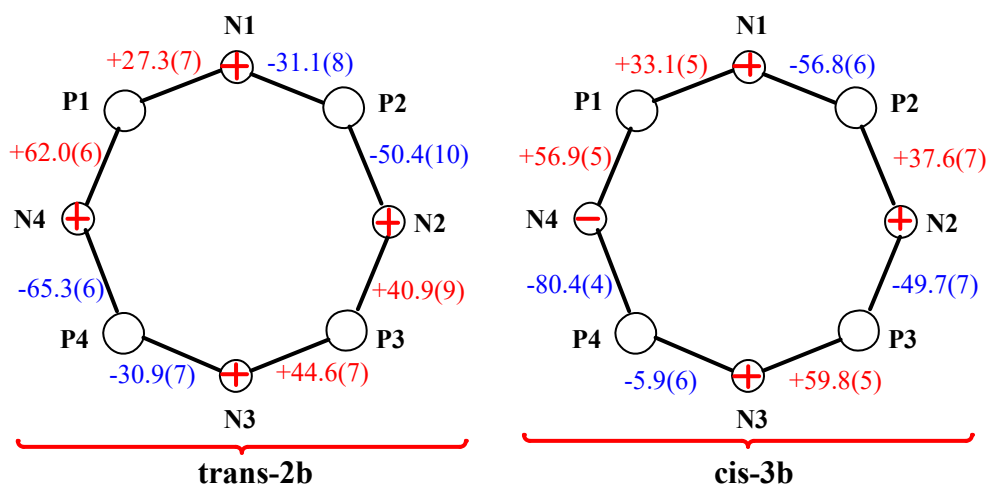

**Fig. S3** The shapes of the phosphazene rings in **trans-2b** and **cis-3b** with torsion angles (deg) given.
